# Supplementary material for: Optimizing complex phenotypes through model-guided multiplex genome engineering
Source: Genome Biol. 2017 May 25;18:100. doi: 10.1186/s13059-017-1217-z (PMC5445303; doi:10.1186/s13059-017-1217-z)
Supplement: Supplementary file 4 — Top mutations from MAGE cycling. (XLSX 37 kb) [file 13059_2017_1217_MOESM4_ESM.xlsx]

## Sheet: S03_top_mutations_from_MAGE_cyc
POSITION	REF	ALT	FIXED	DE_NOVO	GENE	IMPACT	AA
4102449	A	G	TRUE	FALSE	cpxA	MODERATE	W184R
1511492	T	C	FALSE	TRUE	ydcT	MODERATE	S218P
3092256	T	C	FALSE	TRUE	yggR	MODERATE	T283A
3990077	C	T	FALSE	TRUE	cyaA	MODERATE	P301L
1263523	T	C	TRUE	FALSE	hemA	MODERATE	L196P
200214	C	T	TRUE	FALSE	bamA	MODERATE	P763S
322579	C	T	FALSE	TRUE	ykgF	MODERATE	P340S
672170	C	A	TRUE	FALSE	leuS	MODERATE	V613F
